# Supplementary material for: Loss of Gata4 in Sertoli cells impairs the spermatogonial stem cell niche and causes germ cell exhaustion by attenuating chemokine signaling
Source: PubMed Central journal article supplement (PMC4741912; doi:10.18632/oncotarget.6115), 2015-10-14
Supplement: oncotarget-06-37012-s001.pdf [file oncotarget-06-37012-s001.pdf]

**Loss of *Gata4* in Sertoli cells impairs the spermatogonial stem cell niche and causes germ cell exhaustion by attenuating chemokine signaling**

**Supplementary Material**

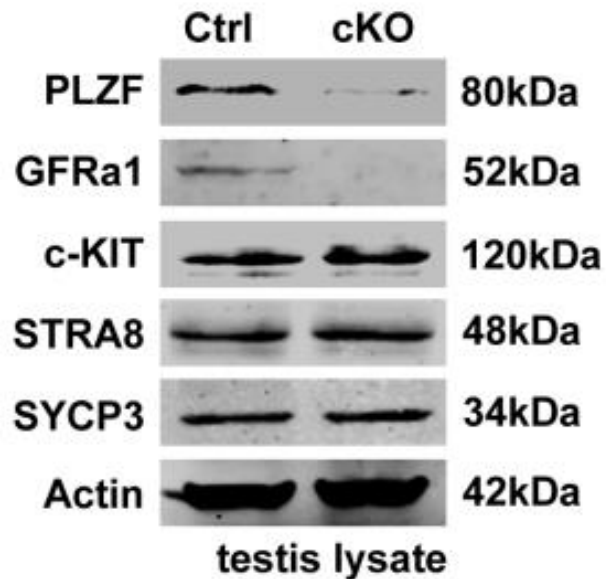

**Figure S1:** Western blot analysis of undifferentiated spermatogonia markers (PLZF and GFRa1), the differentiated spermatogonia marker c-KIT, and meiosis markers (STRA8 and SYCP3) in testis lysate from control and *Gata4* cKO mice. Actin served as a protein loading control.

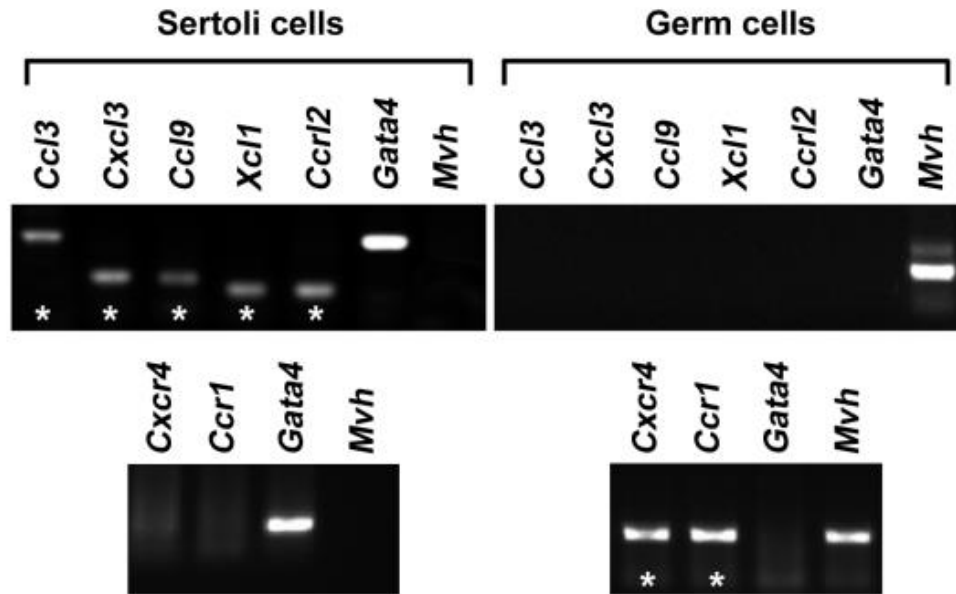

**Figure S2:** RT-PCR amplification of *Cxcl12*, *Ccl3*, *Ccl9*, *Xcl1*, *Ccr12*, *Cxcr4* and *Ccr1* in cDNA samples from Sertoli cells and germ cells from P5 mice. *Gata4* is a Sertoli cell marker, and *Mvh* is a germ cell marker. A representative image from three independent experiments is shown.

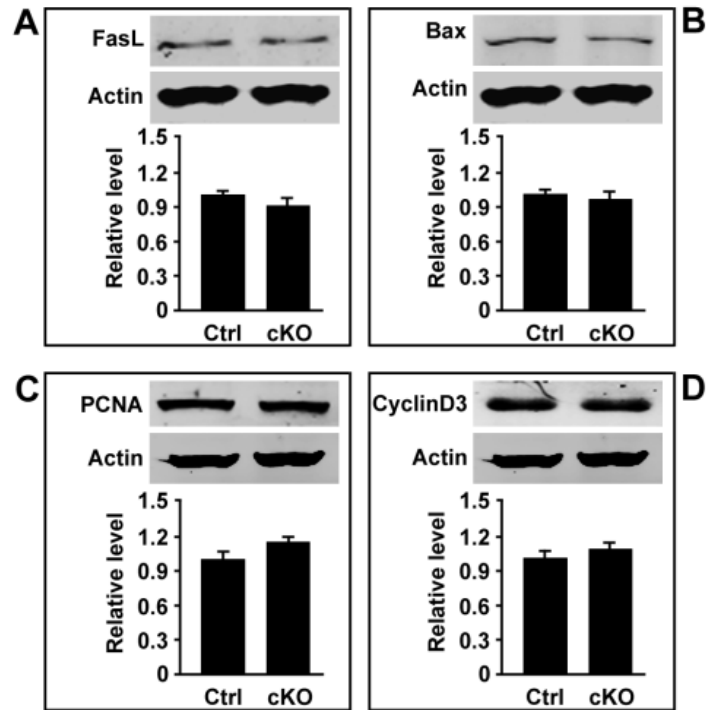

**Figure S3:** Western blot analysis of apoptotic markers (FasL and Bax) and proliferative markers (PCNA and Cyclin D3) in Sertoli cell lysates from control and *Gata4* cKO testes. Actin served as a protein loading control.

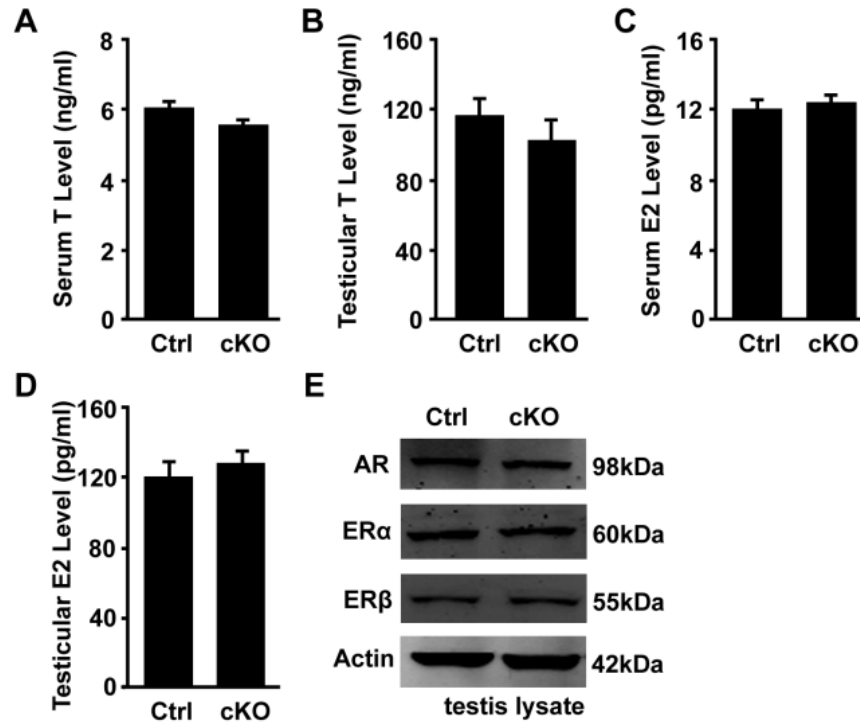

**Figure S4:** Serum and testicular testosterone (T) levels and estradiol (E2) levels in pubertal control and *Gata4* cKO mice ( $n=3$  each group). Western blot analysis of AR, ER $\alpha$  and ER $\beta$  in testis lysates from control and *Gata4* cKO mice. Actin served as a protein loading control.

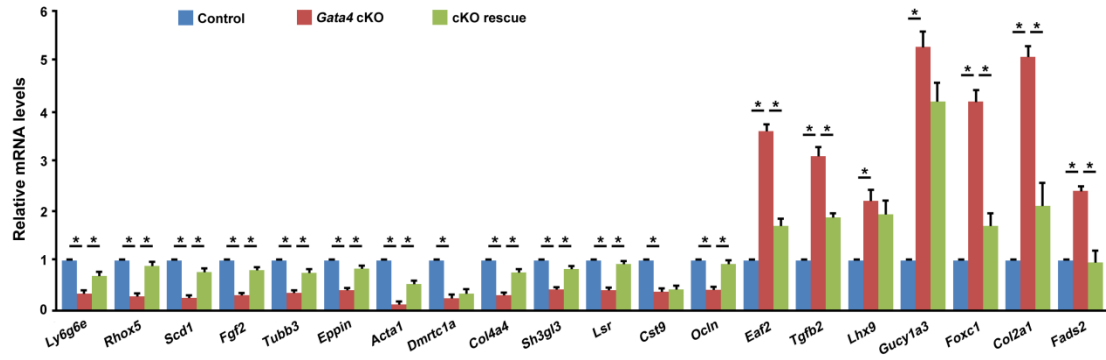

**Figure S5:** q-PCR analysis of twenty genes in cDNA samples from control, *Gata4* cKO and rescue testes (after CXCL12 and CCL9 treatment for 4 days). *Gapdh* served as the internal control gene. The data are expressed as the mean±S.D. \* $p$ <0.05, \*\* $p$ <0.01.

**Supplemental Table 1: Primers used in this study.**

| Name           | Primer sequence                                | Size                                                              |
|----------------|------------------------------------------------|-------------------------------------------------------------------|
| <b>Cre</b>     | Forward: TCCAATTTACTGACCGTACACCAA              | 550bp                                                             |
|                | Reverse: CCTGTACCTGGCAATTTTCGGCTA              |                                                                   |
| <b>flox</b>    | Forward: CCC AGT AAA GAA GTC AGC ACA AGG AAA C | flox/flox= ~455 bp<br>+/flox = 355 bp and ~455 bp<br>+/+ = 355 bp |
|                | Reverse: AGA CTA TTG ATC CCG GAG TGA ACA TT    |                                                                   |
| <b>Wt1</b>     | Forward: AATGACCTCCCAGCTTGAATG                 | 192bp                                                             |
|                | Reverse: CCGTGGGTGTGTATTCTGTACT                |                                                                   |
| <b>Mvh</b>     | Forward: TGTGGTCATATATGGAGGAAC                 | 172bp                                                             |
|                | Reverse: ATCCAACATTCGATCAGCTTC                 |                                                                   |
| <b>Fgf2</b>    | Forward: GCGACCCACACGTCAAACCTA                 | 108bp                                                             |
|                | Reverse: CCGTCCATCTTCCTTCATAGC                 |                                                                   |
| <b>Cxcl12</b>  | Forward: TGCATCAGTGACGGTAAACCA                 | 146bp                                                             |
|                | Reverse: TTCTTCAGCCGTGCAACAATC                 |                                                                   |
| <b>Ccl3</b>    | Forward: TGTACCATGACACTCTGCAAC                 | 109bp                                                             |
|                | Reverse: CAACGATGAATTGGCGTGGAA                 |                                                                   |
| <b>Cxcr4</b>   | Forward: GAGGCCAAGGAAACTGCTG                   | 145bp                                                             |
|                | Reverse: GCGGTCACAGATGTACCTGTC                 |                                                                   |
| <b>Ccr1</b>    | Forward: CTCATGCAGCATAGGAGGCTT                 | 142bp                                                             |
|                | Reverse: ACATGGCATCACCAAAAATCCA                |                                                                   |
| <b>Xcl1</b>    | Forward: TTTGTACCAAACGAGGACTAAA                | 164bp                                                             |
|                | Reverse: CCAGTCAGGGTTATCGCTGTG                 |                                                                   |
| <b>Ccr12</b>   | Forward: CCCCAGGACGATGAATATGATG                | 170bp                                                             |
|                | Reverse: CACCAAGATAAACACCGCCAG                 |                                                                   |
| <b>Gata4</b>   | Forward: CCCTACCCAGCCTACATGG                   | 139bp                                                             |
|                | Reverse: ACATATCGAGATTGGGGTGTCT                |                                                                   |
| <b>Dmrt1</b>   | Forward: GACCCCGCCTACTACAGCA                   | 191bp                                                             |
|                | Reverse: GTCTGAGCAGGCACGTAAGG                  |                                                                   |
| <b>Rhox5</b>   | Forward: ACTCGGAAGAACAGCATGATG                 | 204bp                                                             |
|                | Reverse: CCCTGGTGCCACTATCCTT                   |                                                                   |
| <b>Scd1</b>    | Forward: TTCTTGCGATACTCTGGTGC                  | 104bp                                                             |
|                | Reverse: CGGGATTGAATGTTCTTGTCGT                |                                                                   |
| <b>Tubb3</b>   | Forward: TAGACCCAGCGGCAACTAT                   | 127bp                                                             |
|                | Reverse: GTTCCAGGTTCCAAGTCCACC                 |                                                                   |
| <b>Eppin</b>   | Forward: CCAGGGACCTAGTCTAGCTGA                 | 219bp                                                             |
|                | Reverse: CGACGAAAGTAAGCCATACAGT                |                                                                   |
| <b>Acta1</b>   | Forward: CCCAAAGCTAACCGGGAGAAG                 | 134bp                                                             |
|                | Reverse: CCAGAATCCAACACGATGCC                  |                                                                   |
| <b>Dmrtc1a</b> | Forward: GGAACCTCGTAAGGACTTTTCTC               | 123bp                                                             |
|                | Reverse: TGCATGTGTGATGGATGAGCA                 |                                                                   |
| <b>Col4a4</b>  | Forward: GCCTGGTGTCCGGATCAAAG                  | 211bp                                                             |
|                | Reverse: AGCTGGAGTCAACAAAATGCC                 |                                                                   |
| <b>Tgfb2</b>   | Forward: TCGACATGGATCAGTTTATGCG                | 147bp                                                             |
|                | Reverse: CCCTGGTACTGTTGTAGATGGA                |                                                                   |
| <b>Foxc1</b>   | Forward: CCCCAGGACAAGAAGATCACTC                | 109bp                                                             |
|                | Reverse: AGTTGTGCCGTATGCTGTTT                  |                                                                   |
| <b>Eaf2</b>    | Forward: CCAGCGGGACTTGCATACC                   | 153bp                                                             |
|                | Reverse: GCCAACCTCAAGATTTCTTCAC                |                                                                   |
| <b>Fads2</b>   | Forward: AAGGGAGGTAACCGGGAGAG                  | 150bp                                                             |
|                | Reverse: CCGCTGGGACCATTTGGTAA                  |                                                                   |
| <b>Gapdh</b>   | Forward: TGGATTTGGACGCATTGGTC                  | 211bp                                                             |
|                | Reverse: TTTGCACTGGTACGTGTTGAT                 |                                                                   |

**Supplemental Table 2:** Primary and secondary antibodies used in this study.

| <b>Primary Antibody</b>    | <b>Source</b>  | <b>Code</b> | <b>Application</b> |
|----------------------------|----------------|-------------|--------------------|
| Goat anti-GATA4            | Santa Cruz     | sc-1237     | IHC/WB             |
| Rabbit anti-WT1            | Epitomics      | 2797-1      | IHC                |
| Rabbit anti-MVH            | Abcam          | ab13840     | IHC                |
| Goat anti-GFR $\alpha$ 1   | R&D Systems    | AF560       | IF/WB              |
| Mouse anti-PLZF            | Santa Cruz     | sc-28319    | IF/WB              |
| Rabbit anti-STRA8          | Abcam          | ab49602     | IF/WB              |
| Rabbit anti-c-KIT          | Cell Signaling | #3074       | IF/WB              |
| Mouse anti- $\gamma$ -H2AX | Abcam          | ab26350     | IF                 |
| Rabbit anti-SYCP3          | Abcam          | ab15093     | IF/WB              |
| Goat anti-CXCL12           | Santa Cruz     | sc-6193     | IF                 |
| Rabbit anti-CXCR4          | Abcam          | ab124824    | IF                 |
| Rabbit anti-CCL9           | R&D Systems    | AF463       | IF                 |
| Mouse anti-CCR1            | R&D Systems    | MAB5986     | IF                 |
| Rabbit anti-TRS4           | Our lab        |             | IF                 |
| Rabbit anti-AR             | Abcam          | ab133273    | WB                 |
| Mouse anti-ER $\alpha$     | Abcam          | ab16460     | WB                 |
| Rabbit anti-ER $\beta$     | Abcam          | ab3577      | WB                 |
| Rabbit anti-FasL           | Abcam          | ab68338     | WB                 |
| Rabbit anti-Bax            | Abcam          | ab7977      | WB                 |
| Rabbit anti-PCNA           | Abcam          | ab18197     | WB                 |
| Rabbit anti-Cyclin D3      | Abcam          | ab52598     | WB                 |
| <b>Secondary Antibody</b>  | <b>Source</b>  | <b>Code</b> | <b>Application</b> |
| Anti Rabbit IgG/biotin     | Zhong Shan     | ZB-2010     | IHC                |
| Anti Goat IgG/biotin       | Zhong Shan     | ZB-2050     | IHC                |
| Anti Goat IgG/TRITC        | Invitrogen     | A11058      | IF                 |
| Anti Mouse IgG/FITC        | Cell Signaling | #4408       | IF                 |
| Anti Mouse IgG/TRITC       | Cell Signaling | #8890       | IF                 |
| Anti Rabbit IgG/FITC       | Cell Signaling | #4412       | IF                 |
| Anti Rabbit IgG/TRITC      | Cell Signaling | #8889       | IF                 |
| Anti Goat Dye 800CW        | LI-COR         | 926-32214   | WB                 |

**Supplemental Table 3:** Down-regulated genes in *Gata4* cKO compared to control testes at P5.



| Gene             | Description                                                | NCBI gene ID | Function                                 | Log fold change |                       |
|------------------|------------------------------------------------------------|--------------|------------------------------------------|-----------------|-----------------------|
|                  |                                                            |              |                                          | WT to cKO       | P-value               |
| <i>Spink8</i>    | Serine peptidase inhibitor, Kazal type 8                   | 78709        | Protease inhibitors                      | 27.9            | 1.65×10 <sup>-6</sup> |
| <i>Pcp4</i>      | Purkinje cell protein 4                                    | 18546        | Cell migration/chemotaxis                | 14.0            | 1.38×10 <sup>-6</sup> |
| <i>Cxcr4</i>     | Chemokine (C-X-C motif) receptor 4                         | 12767        | Chemokine receptor                       | 13.5            | 4.30×10 <sup>-4</sup> |
| <i>Acta1</i>     | Actin, alpha 1, skeletal muscle                            | 11459        | Cytoskeletal organization                | 8.0             | 6.69×10 <sup>-3</sup> |
| <i>Enpp2</i>     | Ectonucleotide pyrophosphatase/phosphodiesterase 2         | 18606        | Lipid signaling molecule                 | 5.0             | 5.10×10 <sup>-4</sup> |
| <i>Mybpc1</i>    | Myosin binding protein C, slow-type                        | 109272       | Cell movement                            | 4.6             | 2.24×10 <sup>-3</sup> |
| <i>Ccl3</i>      | Chemokine (C-C motif) ligand 3                             | 20302        | Chemokines                               | 3.6             | 1.79×10 <sup>-3</sup> |
| <i>Rnf138rt1</i> | Ring finger protein 138 pseudogene                         | 74264        | Ring finger protein                      | 4.5             | 3.35×10 <sup>-4</sup> |
| <i>Hoxa10</i>    | Homeobox A10                                               | 15395        | Testicular descent                       | 4.3             | 3.36×10 <sup>-3</sup> |
| <i>Dmrtc1a</i>   | DMRT-like family C1a                                       | 70887        | Sertoli transcription factor             | 4.3             | 5.47×10 <sup>-4</sup> |
| <i>Clec12b</i>   | C-type lectin domain family 12, member B                   | 71183        | Cell surface receptor                    | 4.1             | 7.01×10 <sup>-4</sup> |
| <i>Wfdc10</i>    | WAP four-disulfide core domain 10                          | 629756       | Protease inhibitors                      | 4.1             | 6.36×10 <sup>-3</sup> |
| <i>Col4a4</i>    | Collagen, type IV, alpha 4                                 | 12839        | Extracellular matrix                     | 4.0             | 1.59×10 <sup>-3</sup> |
| <i>Ccl9</i>      | Chemokine (C-C motif) ligand 9                             | 20308        | Chemokines                               | 4.0             | 2.10×10 <sup>-3</sup> |
| <i>Bmp2k</i>     | BMP2 inducible kinase                                      | 140780       | Protein kinase                           | 3.8             | 1.32×10 <sup>-3</sup> |
| <i>Kctd8</i>     | K <sup>+</sup> channel tetramerisation domain containing 8 | 243043       | Subunit of GABA-B receptor               | 3.8             | 7.64×10 <sup>-3</sup> |
| <i>Akr1c18</i>   | Aldo-keto reductase family 1, member C18                   | 105349       | Spermatogonia metabolism                 | 3.7             | 2.51×10 <sup>-3</sup> |
| <i>Cxcl12</i>    | Chemokine (C-X-C motif) ligand 12                          | 20315        | Chemokines                               | 4.6             | 6.80×10 <sup>-3</sup> |
| <i>Map7</i>      | Microtubule-associated protein 7                           | 17761        | Stabilizing microtubules                 | 3.5             | 8.04×10 <sup>-4</sup> |
| <i>Scd1</i>      | Stearoyl-Coenzyme A desaturase 1                           | 20249        | Fatty acid metabolism                    | 3.5             | 1.84×10 <sup>-3</sup> |
| <i>Rhox5</i>     | Reproductive homeobox 5                                    | 18617        | Sertoli cell metabolism                  | 3.5             | 2.49×10 <sup>-3</sup> |
| <i>Nags</i>      | N-acetylglutamate synthase                                 | 217214       | Mitochondrial matrix                     | 3.5             | 2.19×10 <sup>-3</sup> |
| <i>Ly6g6e</i>    | Lymphocyte antigen 6 complex, locus G6E                    | 70274        | Signal transduction                      | 3.4             | 1.92×10 <sup>-3</sup> |
| <i>Fgf2</i>      | Fibroblast growth factor 2                                 | 14173        | SSC self-renew                           | 3.4             | 1.43×10 <sup>-3</sup> |
| <i>Sh3gl3</i>    | SH3-domain GRB2-like 3                                     | 20408        | Cytoskeletal protein                     | 3.4             | 1.37×10 <sup>-3</sup> |
| <i>Zic3</i>      | Zinc finger protein of the cerebellum 3                    | 22773        | Pluripotency maintenance                 | 3.2             | 1.71×10 <sup>-3</sup> |
| <i>Ccr1</i>      | Chemokine (C-C motif) receptor 1                           | 12768        | Chemokine receptor                       | 3.2             | 7.67×10 <sup>-3</sup> |
| <i>Xcl1</i>      | Chemokine (C motif) ligand 1                               | 16963        | Chemokines                               | 3.1             | 1.56×10 <sup>-3</sup> |
| <i>Qpct</i>      | Glutaminy-peptide cyclotransferase                         | 70536        | Glutaminy cyclase                        | 3.0             | 1.85×10 <sup>-3</sup> |
| <i>Gata1</i>     | GATA binding protein 1                                     | 14460        | Sertoli transcriptional factor           | 3.0             | 4.19×10 <sup>-3</sup> |
| <i>Elovl2</i>    | ELOVL fatty acid elongase 2                                | 54326        | Fatty acid elongation                    | 3.0             | 3.59×10 <sup>-3</sup> |
| <i>Tcl1</i>      | T cell lymphoma breakpoint 1                               | 21432        | Akt1 associate                           | 2.9             | 4.98×10 <sup>-3</sup> |
| <i>Wnk4</i>      | WNK lysine deficient protein kinase 3                      | 69847        | Transcellular Ca <sup>2+</sup> transport | 2.9             | 3.88×10 <sup>-3</sup> |
| <i>Ccr2</i>      | Chemokine (C-C motif) receptor-like 2                      | 54199        | Chemokine receptor                       | 2.9             | 2.28×10 <sup>-3</sup> |
| <i>Rarres1</i>   | Retinoic acid receptor responder 1                         | 109222       | RA receptor-responsive gene              | 2.8             | 4.08×10 <sup>-3</sup> |
| <i>Rab20</i>     | RAB20, member RAS oncogene family                          | 19332        | GTP-binding                              | 2.8             | 3.30×10 <sup>-3</sup> |
| <i>Lsr</i>       | Lipolysis stimulated lipoprotein receptor                  | 54135        | Tight junction formation                 | 2.8             | 5.34×10 <sup>-3</sup> |
| <i>Cst9</i>      | Cystatin 9                                                 | 13013        | Sertoli transcription factor             | 2.7             | 2.90×10 <sup>-3</sup> |
| <i>Pip5k1b</i>   | Phosphatidylinositol-4-phosphate 5-kinase, type 1b         | 18719        | Signaling phospholipid                   | 2.7             | 4.67×10 <sup>-4</sup> |
| <i>Adh4</i>      | Alcohol dehydrogenase 4 (class II), pi polypeptide         | 26876        | Retinoic acid (RA) production            | 2.7             | 1.83×10 <sup>-3</sup> |
| <i>Brwd3</i>     | Bromodomain and WD repeat domain containing 3              | 382236       | Chromatin-modification                   | 2.7             | 1.92×10 <sup>-3</sup> |
| <i>Rragb</i>     | Ras-related GTP binding B                                  | 245670       | mTOR activation                          | 2.7             | 5.47×10 <sup>-3</sup> |
| <i>Ap1m2</i>     | Adaptor protein complex AP-1, mu 2 subunit                 | 11768        | CYP26A1-responsive gene                  | 2.6             | 1.35×10 <sup>-3</sup> |
| <i>Frlt1</i>     | Fibronectin leucine rich transmembrane protein 1           | 396184       | AR- and RB-responsive gene               | 2.6             | 7.31×10 <sup>-3</sup> |
| <i>Etd</i>       | Embryonic testis differentiation                           | 69501        | Sertoli transcriptional factor           | 2.6             | 4.82×10 <sup>-3</sup> |
| <i>Chp2</i>      | Calcineurin-like EF hand protein 2                         | 70261        | Cell pH regulation                       | 2.6             | 6.73×10 <sup>-3</sup> |
| <i>Nxf3</i>      | Nuclear RNA export factor 3                                | 245610       | Sertoli cell maturation                  | 2.6             | 1.69×10 <sup>-3</sup> |
| <i>Fzd5</i>      | Frizzled homolog 5 (Drosophila)                            | 14367        | Wnt5a receptor in SSC                    | 2.6             | 1.02×10 <sup>-3</sup> |
| <i>Ppt1</i>      | Palmitoyl-protein thioesterase 1                           | 19063        | Sertoli lipoprotein metabolism           | 2.6             | 5.60×10 <sup>-3</sup> |
| <i>Tubb3</i>     | Tubulin, beta 3 class III                                  | 22152        | Sertoli cell cytoskeleton                | 2.5             | 8.07×10 <sup>-3</sup> |
| <i>Mex3b</i>     | Mex3 homolog B (C. elegans)                                | 108797       | Sertoli cell adhesion                    | 2.5             | 1.38×10 <sup>-3</sup> |
| <i>Dmrt1</i>     | Doublesex and mab-3 related transcription factor 1         | 50796        | Sertoli transcriptional factor           | 2.5             | 8.30×10 <sup>-3</sup> |
| <i>Scd2</i>      | Stearoyl-Coenzyme A desaturase 2                           | 20250        | Fatty acid metabolism                    | 2.4             | 1.25×10 <sup>-3</sup> |
| <i>Irs2</i>      | Insulin receptor substrate 2                               | 384783       | IGF signalling                           | 2.4             | 2.50×10 <sup>-3</sup> |
| <i>Ocln</i>      | Occludin                                                   | 18260        | Tight junction                           | 2.4             | 3.67×10 <sup>-3</sup> |
| <i>Snx7</i>      | Sorting nexin 7                                            | 76561        | Trafficking                              | 2.4             | 1.26×10 <sup>-3</sup> |
| <i>Nrg1</i>      | Neuregulin 1                                               | 211323       | Spermatogonia proliferation              | 2.4             | 8.81×10 <sup>-3</sup> |
| <i>Art3</i>      | ADP-ribosyltransferase 3                                   | 109979       | Protein modification                     | 2.3             | 1.29×10 <sup>-3</sup> |
| <i>Eppin</i>     | Epididymal peptidase inhibitor                             | 75526        | Protease inhibitors                      | 2.3             | 1.28×10 <sup>-3</sup> |
| <i>Gstm6</i>     | Glutathione S-transferase, mu 6                            | 14867        | Sertoli transcriptional factor           | 2.2             | 1.23×10 <sup>-3</sup> |
| <i>Tex12</i>     | Testis expressed gene 12                                   | 66654        | Synapsed axes                            | 2.2             | 1.90×10 <sup>-3</sup> |
| <i>Crim1</i>     | Cysteine rich transmembrane BMP regulator 1                | 50766        | Sertoli transcriptional factor           | 2.2             | 3.93×10 <sup>-3</sup> |
| <i>Vdr</i>       | Vitamin D receptor                                         | 22337        | Vitamin D metabolism                     | 2.1             | 2.87×10 <sup>-3</sup> |
| <i>Col4a3</i>    | Collagen, type IV, alpha 3                                 | 12828        | Extracellular matrix                     | 2.1             | 2.68×10 <sup>-3</sup> |
| <i>Rhox8</i>     | Reproductive homeobox 8                                    | 434768       | Sertoli transcriptional factor           | 2.1             | 2.20×10 <sup>-3</sup> |
| <i>Cadm1</i>     | Cell adhesion molecule 1                                   | 54725        | Cell adhesion                            | 2.1             | 2.45×10 <sup>-3</sup> |
| <i>Syap1</i>     | Synapse associated protein 1                               | 67043        | Synapse                                  | 2.0             | 2.37×10 <sup>-3</sup> |
| <i>Fshr</i>      | Follicle stimulating hormone receptor                      | 14309        | FSH signaling                            | 2.0             | 3.54×10 <sup>-3</sup> |

**Supplemental Table 4:** Up-regulated gene transcripts in P5 *Gata4* cKO compared to control testes.

| Gene            | Description                                      | NCBI gene ID | Function                            | cKO to WT<br>Log fold change | cKO to WT<br>P-value  |
|-----------------|--------------------------------------------------|--------------|-------------------------------------|------------------------------|-----------------------|
| <i>Gpnmb</i>    | Glycoprotein (transmembrane) nmb                 | 78709        | Macrophage activation & adhesion    | 18.3                         | 8.19×10 <sup>-4</sup> |
| <i>Mia1</i>     | Melanoma inhibitory activity 1                   | 12587        | Extracellular matrix                | 16.1                         | 5.92×10 <sup>-6</sup> |
| <i>Lrrtm4</i>   | Leucine rich repeat transmembrane neuronal 4     | 243499       | Membrane protein                    | 14.5                         | 7.73×10 <sup>-3</sup> |
| <i>Ucma</i>     | Upper zone of cartilage matrix associated        | 68527        | Matrix-associated protein           | 13.9                         | 6.05×10 <sup>-4</sup> |
| <i>Tmem26</i>   | Transmembrane protein 26                         | 327766       | Transmembrane protein               | 13.3                         | 8.08×10 <sup>-4</sup> |
| <i>Col2a1</i>   | Collagen, type II, alpha 1                       | 12824        | Extracellular matrix                | 8.1                          | 1.00×10 <sup>-4</sup> |
| <i>Bhlhe22</i>  | Basic helix-loop-helix family, member e22        | 59058        | Transcriptional factor              | 8.1                          | 6.74×10 <sup>-4</sup> |
| <i>Pcsk6</i>    | Proprotein convertase subtilisin/kexin type 6    | 18553        | Follicular proprotein convertase    | 7.7                          | 1.88×10 <sup>-5</sup> |
| <i>Gucy1a3</i>  | Guanylate cyclase 1, soluble, alpha 3            | 60596        | Signal transduction                 | 7.6                          | 1.74×10 <sup>-5</sup> |
| <i>Mapt</i>     | Microtubule-associated protein tau               | 17762        | Stabilizing microtubules            | 7.5                          | 2.15×10 <sup>-4</sup> |
| <i>Gabrb2</i>   | (GABA) A receptor, subunit beta 2                | 14401        | Ligand-gated ion channel            | 7.4                          | 7.06×10 <sup>-4</sup> |
| <i>Svs6</i>     | Seminal vesicle secretory protein 6              | 20945        | Secretion protein                   | 7.4                          | 2.52×10 <sup>-3</sup> |
| <i>kcnk3</i>    | Potassium channel, subfamily K, member 3         | 16527        | K <sup>+</sup> channel              | 7.2                          | 5.78×10 <sup>-6</sup> |
| <i>Naip5</i>    | NLR family, apoptosis inhibitory protein 5       | 17951        | Apoptosis                           | 6.9                          | 6.72×10 <sup>-3</sup> |
| <i>Crispld2</i> | Cysteine-rich secretory protein LCCL domain 2    | 78892        | Cell polarity complex               | 6.8                          | 4.34×10 <sup>-5</sup> |
| <i>Eaf2</i>     | ELL associated factor 2                          | 106389       | Androgen-regulated tumor suppressor | 6.6                          | 1.32×10 <sup>-3</sup> |
| <i>Kcnj10</i>   | Potassium channel, subfamily J, member 10        | 16513        | K <sup>+</sup> channel              | 6.5                          | 7.28×10 <sup>-3</sup> |
| <i>Ntsr1</i>    | Neurotensin receptor 1                           | 18216        | Tumorigenesis                       | 6.3                          | 1.80×10 <sup>-4</sup> |
| <i>Oxtr</i>     | Oxytocin receptor                                | 18430        | Lipid metabolism                    | 6.2                          | 2.00×10 <sup>-4</sup> |
| <i>Xdh</i>      | Xanthine dehydrogenase                           | 22436        | Oxidative metabolism                | 6.1                          | 2.13×10 <sup>-4</sup> |
| <i>Cdhr5</i>    | Cadherin-related family member 5                 | 72040        | Cellular junctions                  | 6.1                          | 4.18×10 <sup>-4</sup> |
| <i>Svs5</i>     | Seminal vesicle secretory protein 5              | 20944        | Unknown function                    | 6.0                          | 8.06×10 <sup>-5</sup> |
| <i>Col27a1</i>  | Collagen, type XXVII, alpha 1                    | 373864       | Extracellular matrix                | 5.9                          | 4.87×10 <sup>-3</sup> |
| <i>Adh1</i>     | Alcohol dehydrogenase 1 (class I)                | 56734        | Vitamin A metabolism                | 5.8                          | 4.81×10 <sup>-5</sup> |
| <i>Hsd3b1</i>   | Hydroxy-delta-steroid dehydrogenase, 3b-1        | 15492        | Steroidogenesis                     | 5.5                          | 5.85×10 <sup>-5</sup> |
| <i>Star</i>     | Steroidogenic acute regulatory protein           | 20845        | Steroidogenesis                     | 5.5                          | 7.64×10 <sup>-4</sup> |
| <i>Gria4</i>    | Glutamate receptor, ionotropic, AMPA4            | 14802        | Gated ion channels                  | 5.5                          | 1.74×10 <sup>-3</sup> |
| <i>Myoc</i>     | Myocilin                                         | 70536        | Glucocorticoid response             | 5.2                          | 2.61×10 <sup>-3</sup> |
| <i>Tmem90b</i>  | Transmembrane protein 90B                        | 433485       | Transmembrane protein               | 5.0                          | 3.41×10 <sup>-3</sup> |
| <i>Col4a6</i>   | Collagen, type IV, alpha 6                       | 94216        | Extracellular matrix                | 5.0                          | 2.08×10 <sup>-4</sup> |
| <i>Bhmt</i>     | Betaine-homocysteine methyltransferase           | 12116        | Folate metabolism                   | 5.0                          | 6.45×10 <sup>-4</sup> |
| <i>Lgf1</i>     | Insulin-like growth factor 1                     | 16000        | Insulin/IGF signaling               | 4.8                          | 7.00×10 <sup>-4</sup> |
| <i>Uhrf2</i>    | Ubiquitin-like, containing PHD and RING finger 2 | 109113       | E3 ubiquitin-protein ligase         | 4.7                          | 1.20×10 <sup>-3</sup> |
| <i>Tgfb2</i>    | Transforming growth factor, beta 2               | 21808        | TGFβ/SMAD pathway, RA               | 4.3                          | 3.89×10 <sup>-4</sup> |
| <i>Pxt1</i>     | Peroxisomal, testis specific 1                   | 69307        | Germ cell apoptosis                 | 4.3                          | 3.20×10 <sup>-4</sup> |
| <i>Foxc1</i>    | Forkhead box C1                                  | 17300        | Granulosa transcription factor      | 4.2                          | 2.51×10 <sup>-3</sup> |
| <i>Cst8</i>     | Cystatin 8                                       | 13012        | Degradation                         | 4.2                          | 3.74×10 <sup>-4</sup> |
| <i>Apoc1</i>    | Apolipoprotein C-I                               | 11812        | Lipid metabolism                    | 3.9                          | 1.07×10 <sup>-3</sup> |
| <i>Car12</i>    | Carbonic anhydrase 12                            | 76459        | Zinc metalloenzyme                  | 3.7                          | 7.19×10 <sup>-4</sup> |
| <i>Vldlr</i>    | Very low density lipoprotein receptor            | 22359        | Lipoprotein metabolism              | 3.7                          | 8.69×10 <sup>-4</sup> |
| <i>Sftpc</i>    | Surfactant associated protein C                  | 20389        | Retinoic Acid-regulated gene        | 3.4                          | 2.79×10 <sup>-3</sup> |
| <i>Phlda1</i>   | Pleckstrin homology-like domain, A, 1            | 21664        | Apoptosis                           | 3.3                          | 7.67×10 <sup>-3</sup> |
| <i>Rai2</i>     | Retinoic acid induced 2                          | 24004        | Retinoic Acid-regulated gene        | 3.2                          | 1.06×10 <sup>-3</sup> |
| <i>Npvf</i>     | Neuropeptide VF precursor                        | 60531        | Apoptosis                           | 3.2                          | 2.24×10 <sup>-3</sup> |
| <i>Amer2</i>    | APC membrane recruitment 2                       | 72125        | Wnt/β-catenin signaling             | 3.1                          | 1.52×10 <sup>-3</sup> |
| <i>Hmgcs2</i>   | Hydroxy-methylglutaryl-Coenzyme A synthase 2     | 15360        | Cholesterol biosynthesis            | 3.1                          | 1.65×10 <sup>-3</sup> |
| <i>Tspan15</i>  | Tetraspanin 15                                   | 70423        | Extracellular matrix                | 3.0                          | 1.83×10 <sup>-3</sup> |
| <i>Lhx9</i>     | LIM homeobox protein 9                           | 16876        | Sertoli transcription factor        | 2.8                          | 5.37×10 <sup>-3</sup> |
| <i>Pik3r1</i>   | PI3K, regulatory subunit, polypeptide 1          | 18708        | PI3K signaling                      | 2.7                          | 5.47×10 <sup>-3</sup> |
| <i>Pde4d</i>    | Phosphodiesterase 4D, cAMP specific              | 238871       | cAMP-catabolizing enzyme            | 2.6                          | 3.00×10 <sup>-3</sup> |
| <i>Igfbp3</i>   | Insulin-like growth factor binding protein 3     | 16009        | Apoptosis                           | 2.5                          | 6.34×10 <sup>-3</sup> |
| <i>Cpxm1</i>    | Carboxypeptidase X 1 (M14 family)                | 56264        | Rhox5-negative regulated gene       | 2.5                          | 6.72×10 <sup>-3</sup> |
| <i>Col4a6</i>   | Collagen, type IV, alpha 6                       | 94216        | Extracellular matrix                | 2.4                          | 1.92×10 <sup>-3</sup> |
| <i>Tbx3</i>     | T-box 3                                          | 21386        | Apoptosis                           | 2.3                          | 2.41×10 <sup>-3</sup> |
| <i>Trim9</i>    | Tripartite motif-containing 9                    | 94090        | E3 ubiquitin-protein ligase         | 2.3                          | 1.91×10 <sup>-3</sup> |
| <i>Col9a2</i>   | Collagen, type IX, alpha 2                       | 12840        | Extracellular matrix                | 2.3                          | 2.13×10 <sup>-3</sup> |
| <i>Ctsd</i>     | Cathepsin D                                      | 13033        | Lysosomal apoptosis                 | 2.3                          | 1.08×10 <sup>-3</sup> |
| <i>Lrp1</i>     | Low density lipoprotein receptor protein 1       | 16971        | Sertoli endocytosis                 | 2.2                          | 1.28×10 <sup>-3</sup> |
| <i>Fads2</i>    | Fatty acid desaturase 2                          | 56473        | Fatty acid synthesis                | 2.2                          | 1.64×10 <sup>-3</sup> |
| <i>Prom1</i>    | Prominin 1                                       | 19126        | Testicular seminoma                 | 2.2                          | 2.71×10 <sup>-3</sup> |
| <i>Smoc1</i>    | SPARC related modular calcium binding 1          | 64075        | Sertoli matricellular protein       | 2.2                          | 1.59×10 <sup>-3</sup> |
| <i>Fads1</i>    | Fatty acid desaturase 1                          | 76267        | Fatty acid synthesis                | 2.1                          | 1.81×10 <sup>-3</sup> |
| <i>Ppp1r9b</i>  | Protein phosphatase 1, regulatory subunit 9B     | 217124       | Retinoic Acid-regulated gene        | 2.1                          | 2.78×10 <sup>-3</sup> |
| <i>Aifm2</i>    | Apoptosis-inducing factor, mitochondrion 2       | 71361        | Apoptosis                           | 2.0                          | 3.78×10 <sup>-3</sup> |
